# Supplementary material
Source: PubMed Central journal article supplement (PMC6867845)
Supplement: IAI.00745-19-s0001.pdf [file IAI.00745-19-s0001.pdf]

1 **Supplemental Material**

2 **Video captions**

3 **Video S1.** Growth of attached *S. aureus* (green) in a control experiment without added  
4 neutrophils (4 h).

5 **Video S2.** *S. aureus* biofilm growth visualized by brightfield microscopy from time  $t = 0.5$  to 8  
6 hours in 10% serum. This is the same field of view as Video S3.

7 **Video S3.** *S. aureus* biofilm growth visualized by overlaid brightfield and fluorescence  
8 microscopy from time  $t = 0.5$  to 8 hours in 10% serum. Green fluorescence consistently overlaps  
9 all bacterial biomass (Video S2) indicating retention of the GFP-encoding plasmid.

10 **Video S4.** Interaction of neutrophils (red) with attached *S. aureus* (green) at an intermediate  
11 neutrophil density of  $\sim 3000$  per  $\text{cm}^{-2}$  and N:B ratio of 0.24 (4 h).

12 **Video S5.** Interaction of neutrophils (red) with attached *S. aureus* (green) at a high neutrophil  
13 density of  $\sim 13000$  per  $\text{cm}^{-2}$  and N:B ratio of 0.66 (4 h).

14 **Video S6.** Interaction of neutrophils (red) with attached *S. aureus* (green) when neutrophils were  
15 added after giving bacteria a 3 h head start (4 h).

16 **Video S7.** Computational simulation of neutrophil-bacteria interaction on a two-dimensional  
17 surface during a 4 h interval. Six bacterial colonies survive the interaction. Figure 5A illustrates  
18 the paths taken by neutrophils during this simulation.

19 **Video S8.** Computational simulation of neutrophil-bacteria interaction on a two-dimensional  
20 surface during a 4 h interval with alternative initial cell locations. This case uses parameter  
21 values identical to the simulation presented in Video S7 (initial bacteria = 12, neutrophils = 8)

22 except that the initial locations of both cell types are different as they have been randomly  
23 placed. In this simulation, 3 bacterial colonies survive to the end of the 4 h simulation period.

24 **Video S9.** Computational simulation of neutrophil-bacteria interaction on a two-dimensional  
25 surface during a 4 h interval with identical cell locations. This case uses parameter values and  
26 initial cell locations that are identical to the simulation presented in Video S7 to show that the  
27 paths taken by neutrophils are quite different as these are stochastic in nature.

28 **Table S1.** Random motility coefficient from mean square displacement versus time analysis. The  
 29 coefficient did not vary significantly between fields of view where there were bacteria and  
 30 neutrophils or where neutrophils were alone.

| Condition              | <i>n</i> | (cm <sup>2</sup> s <sup>-1</sup> ) | (cm <sup>2</sup> s <sup>-1</sup> ) | Mean <i>R</i> <sup>2</sup> |
|------------------------|----------|------------------------------------|------------------------------------|----------------------------|
|                        |          | <i>D</i> <sub>m</sub>              | SD                                 |                            |
| Neutrophils alone      | 4        | 2.15 x 10 <sup>-8</sup>            | 0.72 x 10 <sup>-8</sup>            | 0.950                      |
| Neutrophils + bacteria | 4        | 3.17 x 10 <sup>-8</sup>            | 0.35 x 10 <sup>-8</sup>            | 0.988                      |
| All                    | 8        | 2.67 x 10 <sup>-8</sup>            | 0.75 x 10 <sup>-8</sup>            | 0.969                      |

31

32

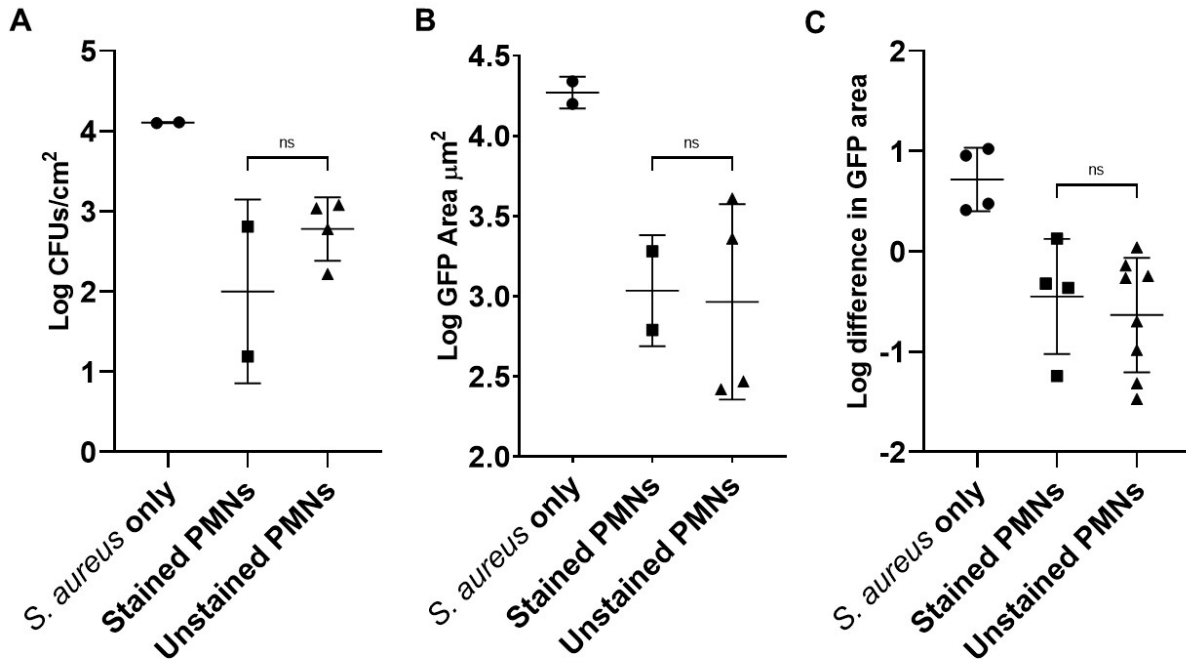

34

35 **Figure S1.** LysoBrite staining does not affect killing of *S. aureus* by neutrophils. Approximately  
 36  $10^3$  CFUs/cm<sup>2</sup> were attached to the surface and challenged with neutrophils that had been stained  
 37 with LysoBrite or received a sham treatment. (A) Bacteria were scraped from the surface,  
 38 vortexed, and plated on tryptic soy agar to determine remaining viable bacteria on the surface.  $n$   
 39 = 2 (control and stained PMNs) or 4 (unstained PMNs) from 2 independent experiments. (B) A  
 40 stitched image of the entire well was generated using the 10x objective to determine the total  
 41 amount of GFP area remaining in each well after a 4 hour challenge with neutrophils.  $n = 2$   
 42 (control and stained PMNs) or 4 (unstained PMNs) from 2 independent experiments. (C) The log  
 43 difference in GFP area over 4 hours for each field of view.  $n = 4$  (control and stained PMNs) or 8  
 44 (unstained PMNs) fields of view from 2 independent experiments. Error bars represent standard  
 45 deviation of the sample. Differences between stained and unstained neutrophils were not  
 46 significant by an unpaired  $t$  test.

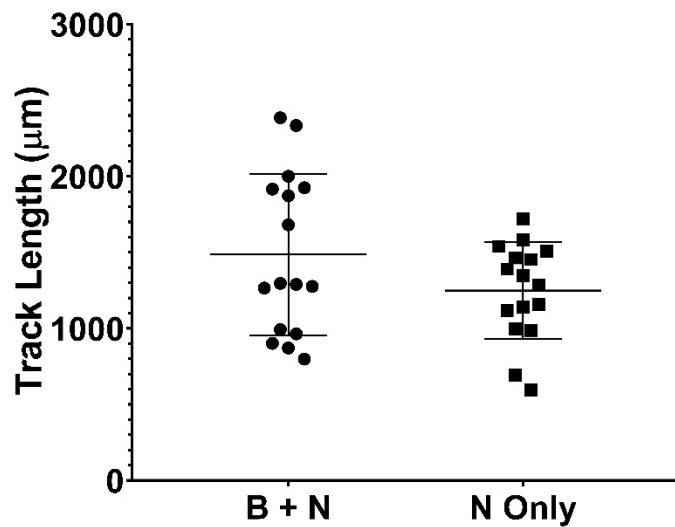

48

49 **Figure S2.** Neutrophil track length is similar on a sterile surface or on a surface seeded with *S.*  
50 *aureus*. The average speed of all neutrophils in a field of view was calculated for each frame and  
51 then integrated with respect to time to obtain an average track length value. The average distance  
52 traveled by a neutrophil did not vary between wells with bacteria and wells without bacteria ( $p =$   
53  $0.1368$  by an unpaired  $t$  test).  $n = 16$  fields of view each from 5 independent experiments. B+N  
54 denotes bacteria with neutrophils; N only denotes neutrophils in the absence of bacteria. Error  
55 bars represent standard deviation of the sample.

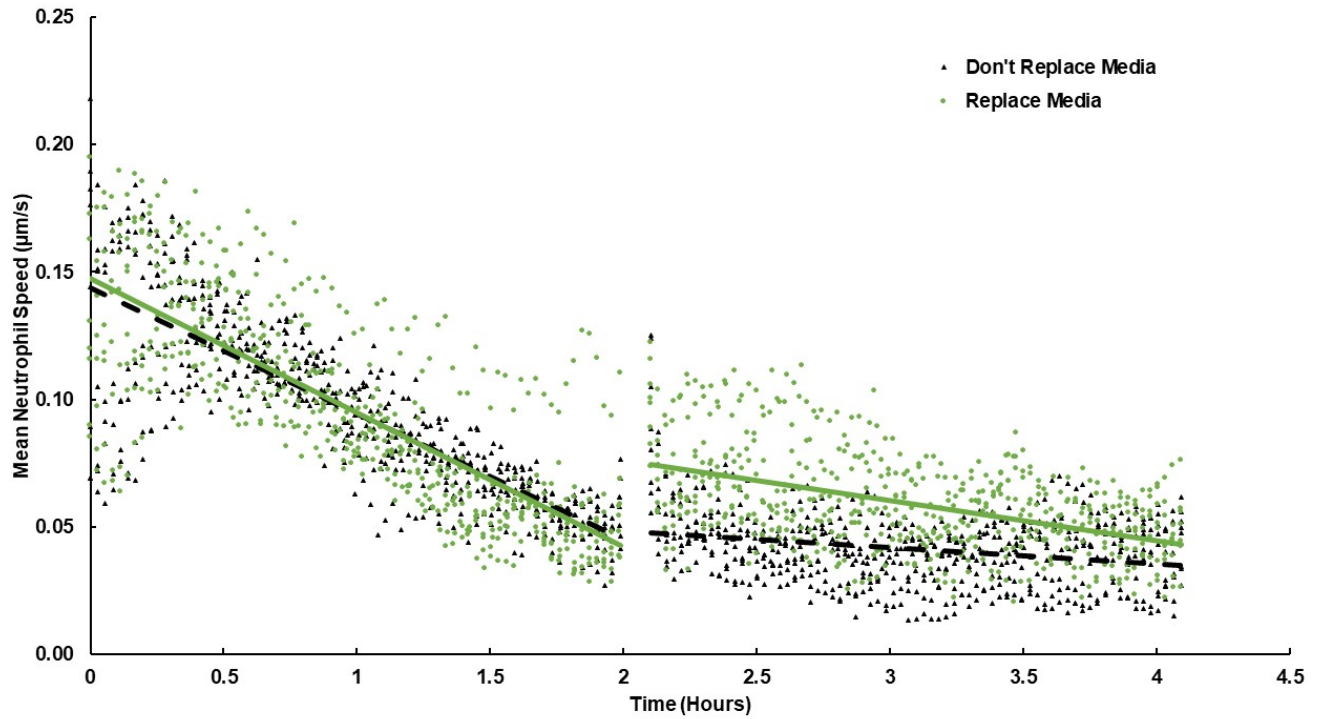

56

57 **Figure S3.** Mean neutrophil speed with and without medium supplementation. Experiments were  
 58 performed with bacteria present. Old medium was gently removed via pipette and replaced with  
 59 10% human serum in HBSS from the same donor (serum was kept on ice and warmed to 37°C  
 60 prior to addition) at 2 h. Neutrophil speed was not restored to starting levels when fresh medium  
 61 was added, however a slight increase in speed was observed compared to control wells ( $p <$   
 62 .0001).  $n = 8$  fields of view, 2 independent experiments.

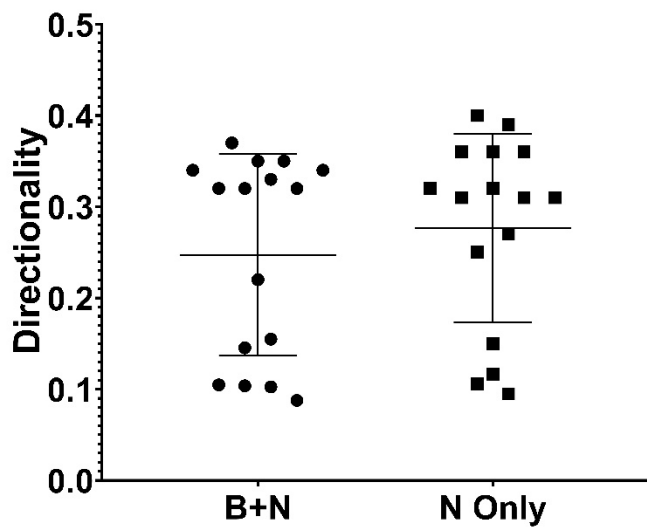

63

64 **Figure S4.** Neutrophil directionality measured by dividing displacement by total distance  
 65 traveled. No statistically significant difference was observed between experiments with bacteria  
 66 and neutrophil only controls ( $p = 0.4453$  by an unpaired t test).  $n = 16$  fields of view each from 5  
 67 independent experiments. B+N denotes bacteria with neutrophils; N only denotes neutrophils in  
 68 the absence of bacteria. Error bars represent standard deviation of the sample.

69

70

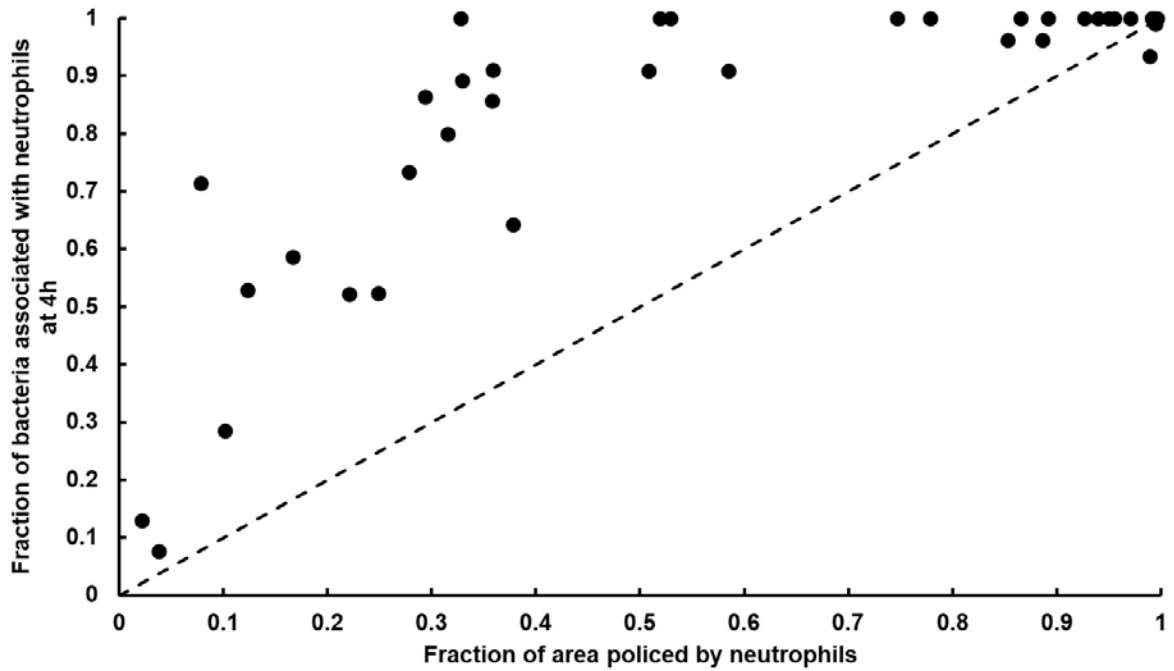

71

72 **Figure S5.** Fraction of bacterial objects discovered as a function of the fraction of the surface  
73 area patrolled by neutrophils. The fraction of bacterial aggregates that were discovered by a  
74 neutrophil within the 4 hour observation window were determined manually. The dashed line  
75 represents the expected curve if aggregate discovery was purely random.  $n = 39$  fields of view  
76 from 9 independent experiments.

77



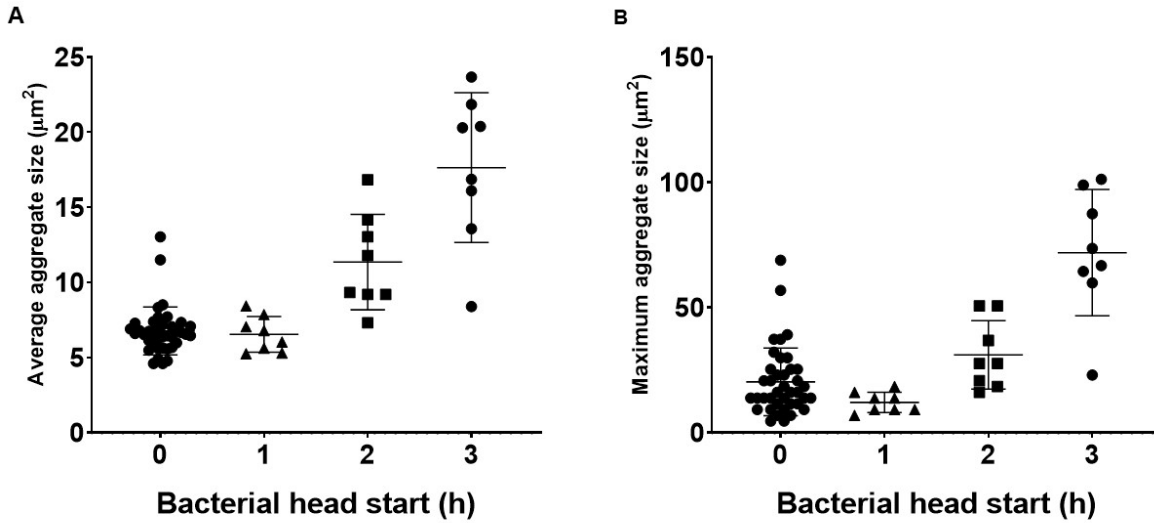

78

79 **Figure S6:** *S. aureus* aggregate sizes at  $t = 0$ . (A) The average size of a *S. aureus* aggregate at the  
80 start of imaging given different head start times. Each point represents the average size of all  
81 aggregates in a field of view. (B) The maximum observed aggregate size in a field of view at the  
82 start of imaging.  $n = 24$  fields of view from 4 independent experiments for head start data.  $n = 39$   
83 fields of view from 9 independent experiments for without head starts. Error bars represent  
84 standard deviation of the sample.

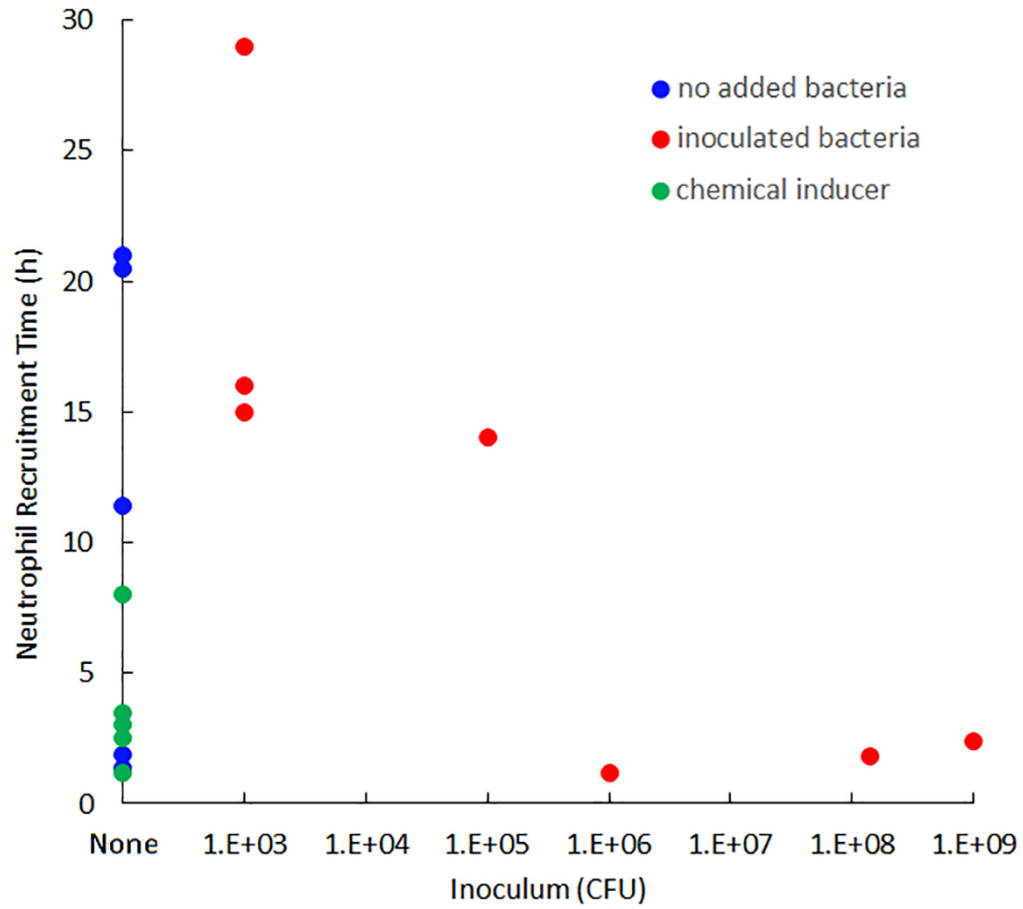

85

86 **Figure S7.** Neutrophil recruitment times measured in murine models. See the supplemental  
 87 methods that follow for details.

88

89 **Methods for literature survey of neutrophil recruitment times in murine models.** We  
90 identified 18 published data sets from 14 papers (Table S2) that contained sufficient quantitative  
91 information to extract a numerical value of a characteristic neutrophil recruitment time. This  
92 time was estimated by fitting a logistic function, which is an S-shaped curve, to neutrophil signal  
93 versus time data of the form

94 
$$N(t) = \frac{N^*}{1 + \exp(-k(t - t_o))}$$

95 where  $N(t)$  is neutrophil signal as a function of time,  $N^*$  is the plateau neutrophil signal at long  
96 time,  $t$  is time,  $k$  is a parameter reflecting the steepness of the response, and  $t_o$  is the characteristic  
97 time for the response to occur. The parameter  $t_o$  is the time value plotted in Figure S5. This time  
98 corresponds to the inflection point of the S-shaped curve.

99 The data sets analyzed are summarized in Table S2 below. The data include experiments with  
100 chemical inducers (no added bacteria), inoculated *Staphylococcus aureus* or *Staphylococcus*  
101 *epidermidis* (other microorganisms were excluded from the search), and some controls in which  
102 implants without added bacteria were investigated.

103

104 **Table S2.** Summary of neutrophils recruitment times, anatomical sites, stimuli, and sources.

| Site              | Stimulus                                         | no<br>bacteria<br>(h)<br>$t_0$ | bacteria<br>(h)<br>$t_0$ | chemical<br>(h)<br>$t_0$ | Inoculum<br>(cfu) | Source |
|-------------------|--------------------------------------------------|--------------------------------|--------------------------|--------------------------|-------------------|--------|
| skin on back      | punch biopsy (no inoculation)                    | 11.4                           |                          |                          | none              | 1      |
| subQ              | Ti disk, uninfected                              | 20.5                           |                          |                          | none              | 2      |
| subQ              | Ti disk coated with <i>S. aureus</i>             |                                | 21                       |                          | NR                | 2      |
| spine, L4 process | Stainless steel (SS) implant - control           | 21                             |                          |                          | none              | 3      |
| spine, L4 process | SS implant inoculated with <i>S. epidermidis</i> |                                | 29                       |                          | $10^3$            | 3      |
| subQ              | agar bead containing <i>S. aureus</i>            |                                | 1.2                      |                          | $10^6$            | 4      |
| knee joint        | SS implant, <i>S. aureus</i> strain Xen 40       |                                | 16                       |                          | $10^3$            | 5      |
| knee joint        | SS implant, <i>S. aureus</i> strain ALC2906      |                                | 15                       |                          | $10^3$            | 5      |
| peritoneum        | injection 30 $\mu$ g LPS                         |                                |                          | 8                        | none              | 6      |
| knee joint        | injection of <i>S. aureus</i>                    |                                | 14                       |                          | $10^5$            | 7      |
| pleural cavity    | injection of 100 $\mu$ g zymosan                 |                                |                          | 3                        | none              | 8      |
| air pouch on back | injection of 0.5 $\mu$ g MIP-2                   |                                |                          | 1.2                      | none              | 9      |
| peritoneum        | injection of 1 mg zymosan                        |                                |                          | 3.5                      | none              | 10     |
| liver             | sterile thermal injury                           | 1.9                            |                          |                          | none              | 11     |
| skin on back      | 6 mm full thickness punch biopsy                 | 1.4                            |                          |                          | none              | 12     |
| peritoneum        | injection of 5 mg/kg peptidoglycan               |                                |                          | 2.5                      | none              | 13     |
| peritoneum        | injection of <i>S. aureus</i>                    |                                | 2.4                      |                          | $10^9$            | 13     |
| peritoneum        | injection of <i>S. aureus</i>                    |                                | 1.8                      |                          | $1.4 \times 10^8$ | 14     |
|                   | Mean                                             | 11.2                           | 12.6                     | 3.6                      |                   |        |
|                   | SD                                               | 9.6                            | 10.1                     | 2.6                      |                   |        |

105 NR – not reported; SD – standard deviation.

106 **References**

- 107 1. Kim MH, Liu W, Borjesson DL, Curry FR, Miller LS, Cheung AL, Liu FT, Isseroff RR,  
108 Simon SI. 2008. Dynamics of neutrophil infiltration during cutaneous wound healing and  
109 infection using fluorescence imaging. *J Invest Dermatol* 128:1812-1820.  
110
- 111 2. Stavrakis AI, Niska JA, Shahbazian JH, Loftin AH, Ramos RI, Billi F, Francis KP, Otto M,  
112 Bernthal NM, Uslan DZ, Miller LS. 2014. Combination prophylactic therapy with rifampin  
113 increases efficacy against an experimental *Staphylococcus epidermidis* subcutaneous  
114 implant-related infection. *Antimicrob Agents Chemother* 58:2377-2386.  
115
- 116 3. Dworsky EM, Hegde V, Loftin AH, Richman S, Hu Y, Lord E, Francis KP, Miller LS, Wang  
117 JC, Scaduto A, Bernthal NM. 2017. Novel in vivo mouse model of implant related spine  
118 infection. *J Orthop Res* 35:193-199.  
119
- 120 4. Harding MG, Zhang K, Conly J, Kubes P. 2014. Neutrophil crawling in capillaries; a novel  
121 immune response to *Staphylococcus aureus*. *PLoS Pathog* 10:e1004379.  
122
- 123 5. Pribaz JR, Bernthal NM, Billi F, Cho JS, Ramos RI, Guo Y, Cheung AL, Francis KP, Miller  
124 LS. 2012. Mouse model of chronic post-arthroplasty infection: noninvasive in vivo  
125 bioluminescence imaging to monitor bacterial burden for long-term study. *J Orthop Res*  
126 30:335-340.  
127

- 128 6. Gonçalves AS, Appelberg R. 2002. The involvement of the chemokine receptor CXCR2 in  
129 neutrophil recruitment in LPS-induced inflammation and in *Mycobacterium avium* infection.  
130 Scand J Immunol 55:585-591.  
131
- 132 7. Boff D, Oliveira VLS, Queiroz Junior CM, Silva TA, Allegretti M, Verri WA Jr, Proost P,  
133 Teixeira MM, Amaral FA. 2018. CXCR2 is critical for bacterial control and development of  
134 joint damage and pain in *Staphylococcus aureus*-induced septic arthritis in mouse. Eur J  
135 Immunol 48:454-463.  
136
- 137 8. Takeshita K, Sakai K, Bacon KB, Gantner F. 2003. Critical role of histamine H4 receptor in  
138 leukotriene B4 production and mast cell-dependent neutrophil recruitment induced by  
139 zymosan in vivo. J Pharmacol Exp Ther 307:1072-1078.  
140
- 141 9. McColl SR, Clark-Lewis I. 1999. Inhibition of murine neutrophil recruitment in vivo by  
142 CXC chemokine receptor antagonists. J Immunol 163:2829-2835.  
143  
144

- 145 10. Watzlawick R, Kenngott EE, Liu FD, Schwab JM, Hamann A. 2015. Anti-inflammatory  
146 effects of IL-27 in zymosan-induced peritonitis: inhibition of neutrophil recruitment partially  
147 explained by impaired mobilization from bone marrow and reduced chemokine levels. PLoS  
148 One 10:e0137651.
- 149
- 150 11. McDonald B, Pittman K, Menezes GB, Hirota SA, Slaba I, Waterhouse CC, Beck PL,  
151 Muruve DA, Kubes P. 2010. Intravascular danger signals guide neutrophils to sites of sterile  
152 inflammation. Science 330:362-366.
- 153
- 154 12. Liu M, Chen K, Yoshimura T, Liu Y, Gong W, Le Y, Gao JL, Zhao J, Wang JM, Wang A.  
155 2014. Formylpeptide receptors mediate rapid neutrophil mobilization to accelerate wound  
156 healing. PLoS One 9:e90613.
- 157
- 158 13. Mullaly SC, Kubes P. 2006. The role of TLR2 in vivo following challenge with  
159 *Staphylococcus aureus* and prototypic ligands. J Immunol 177:8154-8163.
- 160
- 161 14. Weiss E, Hanzelmann D, Fehlhaber B, Klos A, von Loewenich FD, Liese J, Peschel A,  
162 Kretschmer D. 2018. Formyl-peptide receptor 2 governs leukocyte influx in local  
163 *Staphylococcus aureus* infections. FASEB J 32:26-36.
- 164

**Supplemental Material: Solution of the Chemoattractant Concentration Equation.** The chemoattractant concentration  $u(\mathbf{x}, t)$  satisfies the equation

$$u_t = D_1 \nabla^2 u + 2\beta \sum_{j=1}^{12} \sum_{k, \ell \in \mathbb{Z}} c_j(t) \delta(\mathbf{x} - (\mathbf{x}_j + (800k, 800\ell, 0))),$$

with initial and boundary conditions

$$u(\mathbf{x}, 0) = 2\beta \sum_{j=1}^{12} \sum_{k, \ell \in \mathbb{Z}} \delta(\mathbf{x} - (\mathbf{x}_j + (800k, 800\ell, 0))), \quad \frac{\partial u}{\partial z}(x, y, 0, t) = 0.$$

Here,

$$c_j(t) = \begin{cases} e^{rt} & 0 \leq t < T_j \\ 0 & t \geq T_j \end{cases}$$

is the population of colony  $j$ , and  $T_j$  is the time of first encounter of a neutrophil with that colony ( $T_j$  may be larger than the total run time of 240 min.).

Note by linearity that we can decompose

$$u(\mathbf{x}, t) = \sum_{j=1}^{12} u_j(\mathbf{x}, t)$$

where  $u_j$  is the contribution to total chemoattractant concentration from bacteria colony  $j$ , where  $u_j$  satisfies

$$(u_j)_t = D_1 \nabla^2 u_j + 2\beta \sum_{k, \ell \in \mathbb{Z}} c_j(t) \delta(\mathbf{x} - (\mathbf{x}_j + (800k, 800\ell, 0))),$$

with initial and boundary conditions

$$u_j(\mathbf{x}, 0) = 2\beta \sum_{k, \ell \in \mathbb{Z}} \delta(\mathbf{x} - (\mathbf{x}_j + (800k, 800\ell, 0))), \quad \frac{\partial u_j}{\partial z}(x, y, 0, t) = 0.$$

For  $t < T_j$  these systems have solutions

$$\begin{aligned} u_j(\mathbf{x}, t) &= \sum_{k, \ell \in \mathbb{Z}} \int_0^t \frac{2\beta c_j(\hat{t})}{(4\pi D_1(t - \hat{t}))^{3/2}} \exp\left(-\frac{|\mathbf{x} - (\mathbf{x}_j + (800k, 800\ell, 0))|^2}{4D_1(t - \hat{t})}\right) d\hat{t} \\ &= \sum_{k, \ell \in \mathbb{Z}} \frac{\beta c_j(t)}{4\pi D_1 |\mathbf{x} - (\mathbf{x}_j + (800k, 800\ell, 0))|} \\ &\quad \left[ \exp\left(-|\mathbf{x} - (\mathbf{x}_j + (800k, 800\ell, 0))| \sqrt{\frac{r}{D_1}}\right) \operatorname{erfc}\left(\frac{|\mathbf{x} - (\mathbf{x}_j + (800k, 800\ell, 0))|}{\sqrt{4D_1 t}} - \sqrt{rt}\right) \right. \\ &\quad \left. + \exp\left(|\mathbf{x} - (\mathbf{x}_j + (800k, 800\ell, 0))| \sqrt{\frac{r}{D_1}}\right) \operatorname{erfc}\left(\frac{|\mathbf{x} - (\mathbf{x}_j + (800k, 800\ell, 0))|}{\sqrt{4D_1 t}} + \sqrt{rt}\right) \right], \end{aligned}$$



where  $\operatorname{erfc}(z) = 1 - \operatorname{erf}(z) = \frac{2}{\sqrt{\pi}} \int_z^\infty e^{-t^2} dt$  is the complementary error function.

For  $t \geq T_j$ , the solution is

$$\begin{aligned}
u_j(\mathbf{x}, t) &= \sum_{k, \ell \in \mathbb{Z}} \int_0^{T_j} \frac{2\beta c_j(\hat{t})}{(4\pi D_1(t - \hat{t}))^{3/2}} \exp\left(\frac{-|\mathbf{x} - (\mathbf{x}_j + (800k, 800\ell, 0))|^2}{4D_1(t - \hat{t})}\right) d\hat{t} \\
&= \sum_{k, \ell \in \mathbb{Z}} \frac{\beta c_j(t)}{4\pi D_1 |\mathbf{x} - (\mathbf{x}_j + (800k, 800\ell, 0))|} \\
&\quad \left\{ \exp\left(-|\mathbf{x} - (\mathbf{x}_j + (800k, 800\ell, 0))| \sqrt{\frac{r}{D_1}}\right) \right. \\
&\quad \left[ \operatorname{erfc}\left(\frac{|\mathbf{x} - (\mathbf{x}_j + (800k, 800\ell, 0))|}{\sqrt{4D_1 t}} - \sqrt{rt}\right) - \operatorname{erfc}\left(\frac{|\mathbf{x} - (\mathbf{x}_j + (800k, 800\ell, 0))|}{\sqrt{4D_1(t - T_j)}} - \sqrt{r(t - T_j)}\right) \right] \\
&\quad + \exp\left(|\mathbf{x} - (\mathbf{x}_j + (800k, 800\ell, 0))| \sqrt{\frac{r}{D_1}}\right) \\
&\quad \left. \left[ \operatorname{erfc}\left(\frac{|\mathbf{x} - (\mathbf{x}_j + (800k, 800\ell, 0))|}{\sqrt{4D_1 t}} + \sqrt{rt}\right) - \operatorname{erfc}\left(\frac{|\mathbf{x} - (\mathbf{x}_j + (800k, 800\ell, 0))|}{\sqrt{4D_1(t - T_j)}} + \sqrt{r(t - T_j)}\right) \right] \right\}
\end{aligned}$$
